# Supplementary material for: Seismic Design of Residential Buildings in Saudi Arabia Using SBC301-24 and SBC1101-24: A Comparative Study with Dynamic Analysis
Source: Research Square preprint supplement (doi:10.21203/rs.3.rs-8479590/v1), 2026-01-16
Supplement: Supplementary file 1 [file 0236e46dd1e52cccfb0c6714.docx]

**Statements & Declarations**

- Availability of data and materials

All data used in this work are incorporated into the article and its online supplementary material.

- Competing interest

*Author of this paper declares he has no financial interests. “The authors have no relevant financial or non-financial interests to disclose.”*

- Funding

The authors declare that no funds, grants, or other support were received during the preparation of this manuscript.

- Acknowledgements

Authors thank all associated personnel that have contributed to this study.

- Conflict of interest

The authors affirm that the publication of this work does not include any conflict of interest.
